# Supplementary material for: Attitudes of laboratory animal professionals and researchers towards carbon dioxide euthanasia for rodents and perceived barriers to change
Source: PubMed Central journal article supplement (PMC8669199; doi:10.1177/00236772211025166), 2021-07-01
Supplement: sj-pdf-2-lan-10.1177_00236772211025166.pdf [file sj-pdf-2-lan-10.1177_00236772211025166.pdf]

**Attitudes of laboratory animal professionals and researchers towards carbon dioxide euthanasia for rodents and perceived barriers to change**

Supplementary Materials

**Supplementary Table 1.** Primary data

[insert S2 Primary Data.xlsx]
